# Supplementary material for: A facile synthesis of porous N-doped carbon with hybridization of Fe3C nanoparticle-encased CNTs for an advanced oxygen reduction reaction electrocatalyst
Source: Royal Society of Chemistry journal article supplement (doi:10.1039/c8qi00681d), 2018-01-01
Supplement: c8qi00681d1.pdf [file c8qi00681d1.pdf]

## Electronic Supplementary Information

# A Facile Synthesis of Porous N-Doped Carbon with Hybridization of Fe<sub>3</sub>C Nanoparticle-Encased CNT for an Advanced Oxygen Reduction Reaction Electrocatalyst

Pingping Zhao, Hanqiu Nie, Jiahao Yu, Jianbo Wang and Gongzhen Cheng

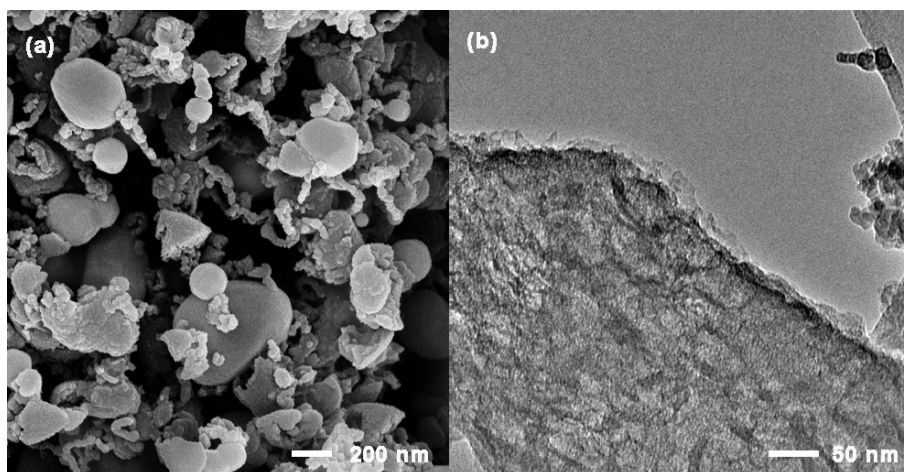

Figure. S1 SEM image (a) and TEM (b) image of the sample FeNC-700 obtained at the initial 0.5h.

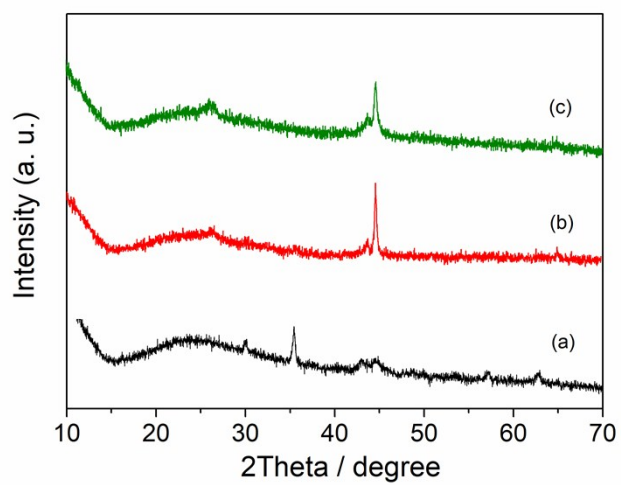

Figure S2. Powder X-ray diffraction pattern of FeNC-X samples: (a) FeNC-700; (b) FeNC-800; (c) FeNC-900.

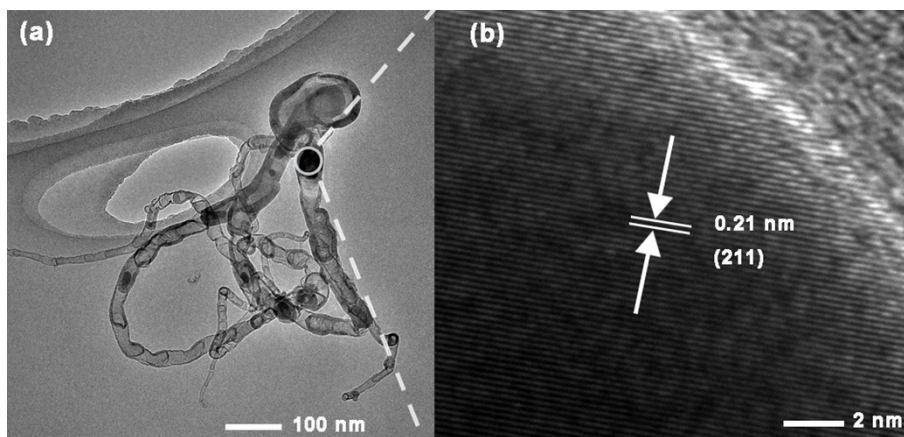

Figure S3. TEM image of FeNC-800.

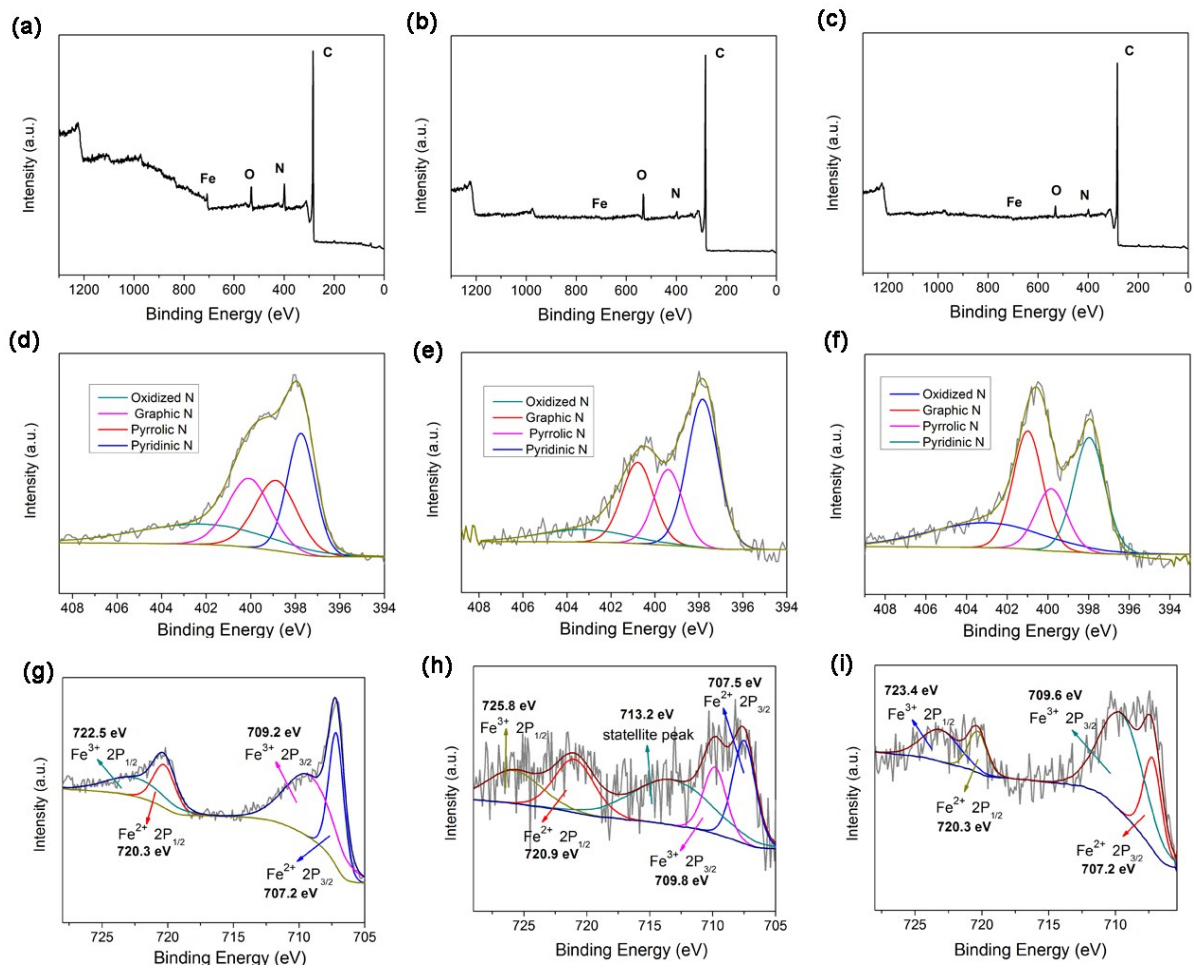

Figure S4. XPS spectrum of (left) FeNC-700; (middle) FeNC-800; (right) FeNC-900: (a-c) Survey pattern; (d-f) high-resolution spectrum of N; (g-i) high-resolution spectrum of Fe.

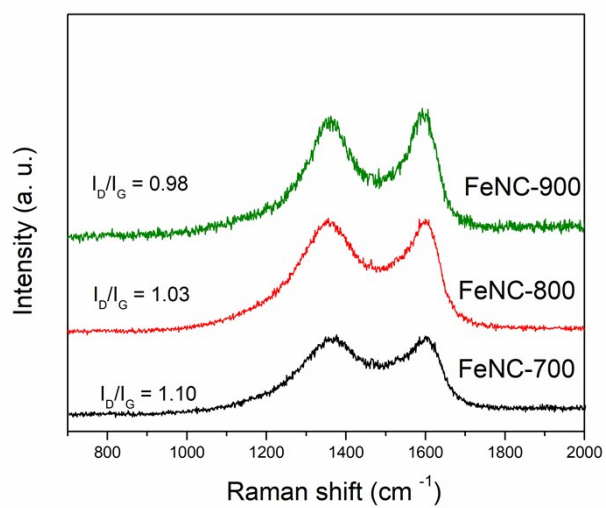

Figure S5. Impedance data for FeNC-X samples and FeNC-ZIF-800.

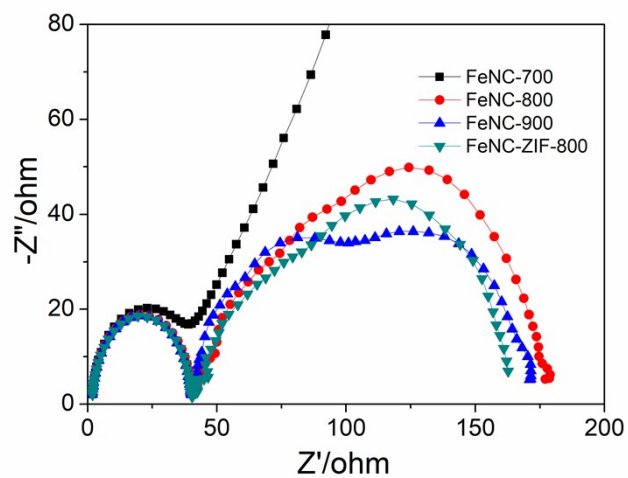

Figure S6. Impedance data for FeNC-X samples and FeNC-ZIF-800.

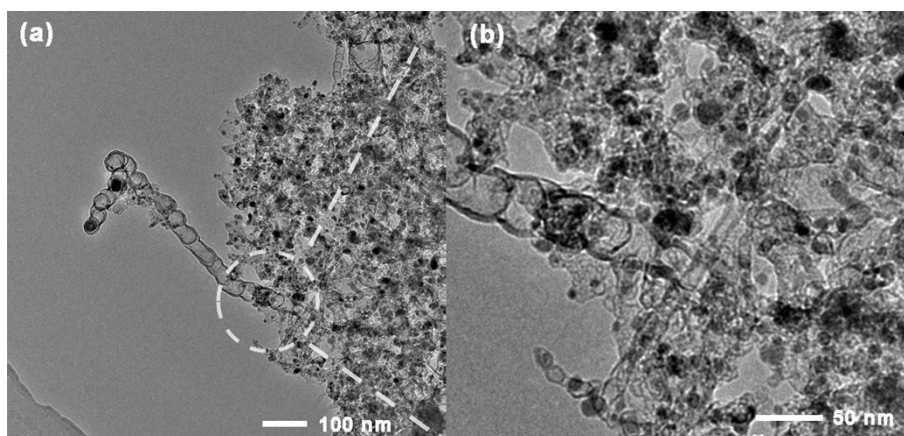

Figure S7. TEM image of the interface of N-doped carbon and carbon nanotubes in FeNC-ZIF-800.

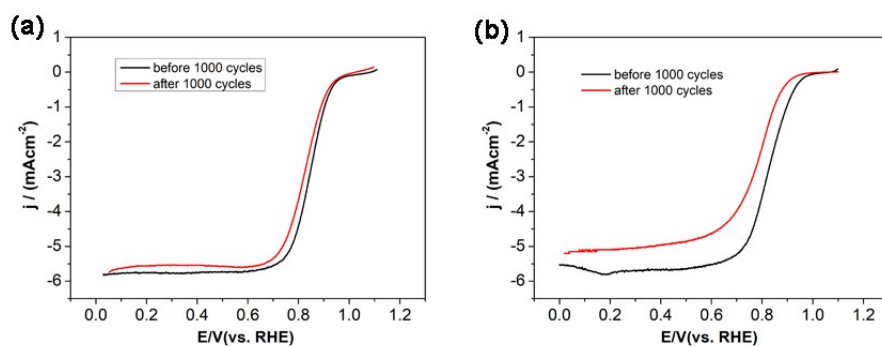

Figure S8. ORR polarization curves before and after 1000 cycles charge-discharge process of FeNC-ZIF-800 (a) and Pt/C (b) in  $O_2$ -saturated 0.1 M KOH solution.

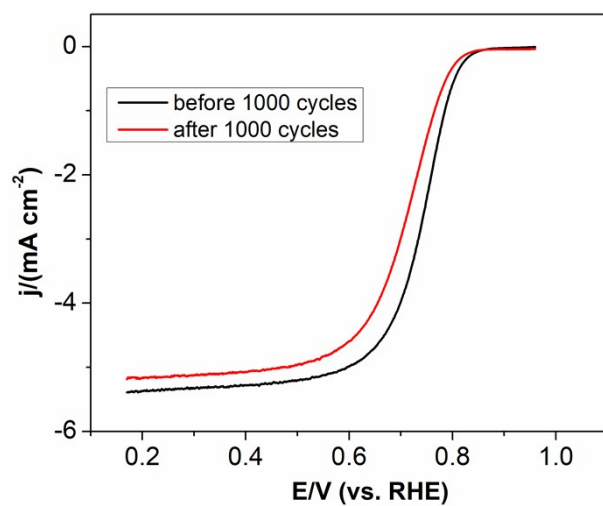

Figure S9. ORR polarization curves before and after 1000 cycles charge-discharge process of FeNC-ZIF-800 in O<sub>2</sub>-saturated 0.5 M H<sub>2</sub>SO<sub>4</sub> solution.

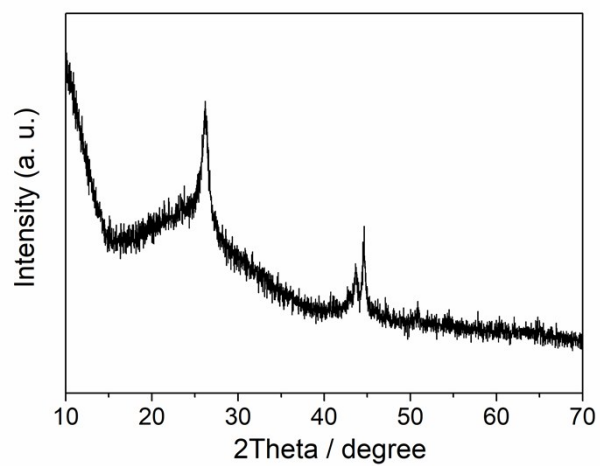

Figure S10. XRD pattern of FeNC-1000.

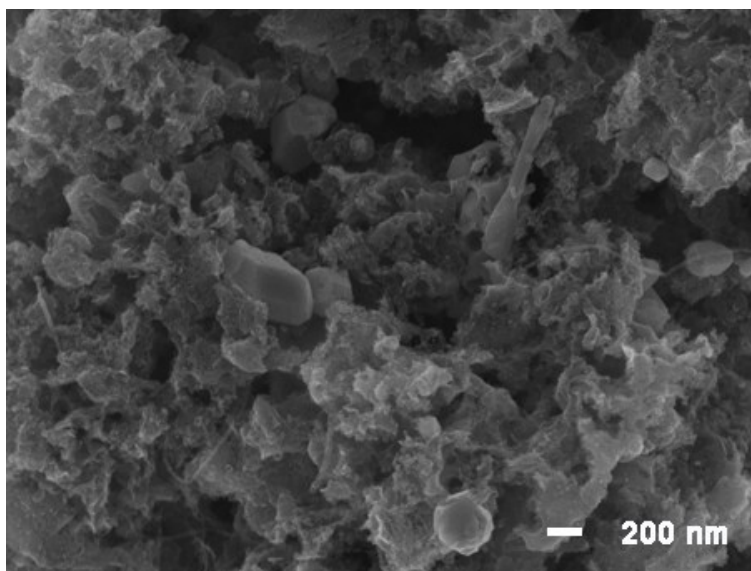

Figure S11. SEM image of FeNC-1000.

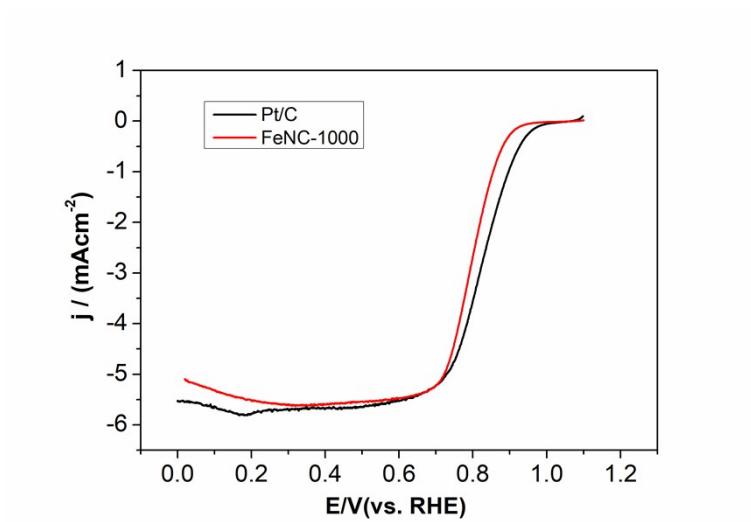

Figure S12. ORR polarization curve of FeNC-1000 in O<sub>2</sub>-saturated 0.1 M KOH solution.

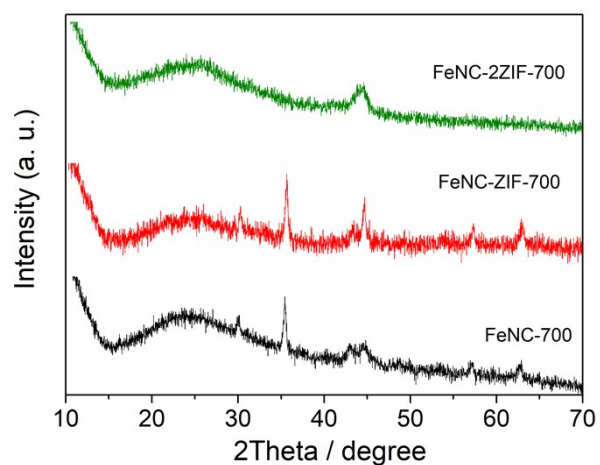

Figure S13. XRD pattern of samples obtained at 700 °C. (FeNC-2ZIF-800 means the amount of ZIF in the precursors are 200% of that in FeNC-ZIF-700).

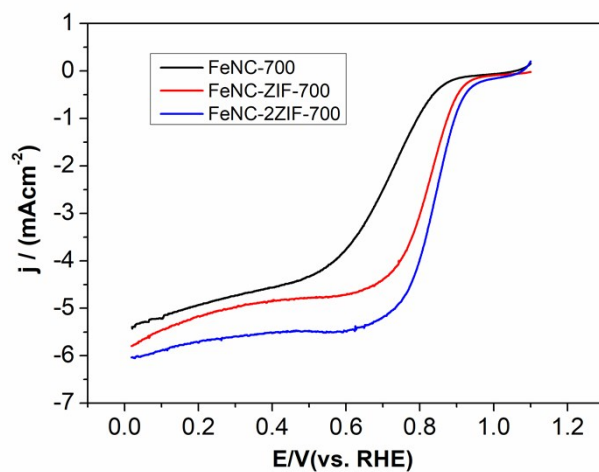

Figure S14. ORR polarization curves of samples obtained at 700 °C in O<sub>2</sub>-saturated 0.1 M KOH solution.



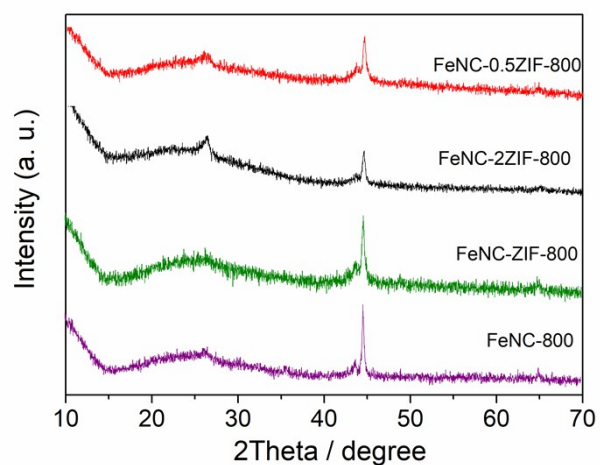

Figure S15. XRD pattern of samples obtained at 800 °C. (FeNC-2ZIF-800 and FeNC-0.5ZIF-800 mean the amount of ZIF in the precursors are 200% or 50% of that in FeNC-ZIF-800)

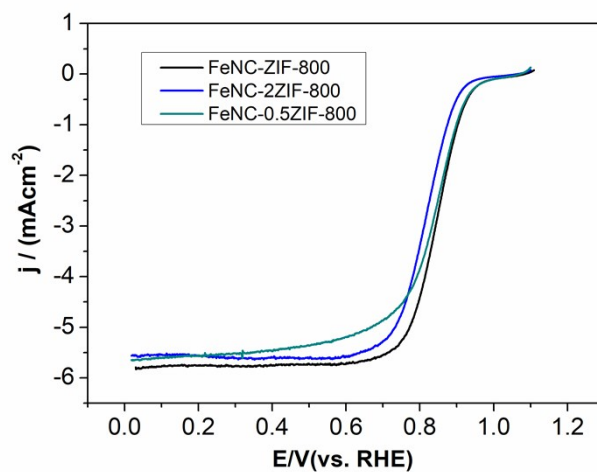

Figure S16. ORR polarization curves of samples obtained at 800 °C in  $\text{O}_2$ -saturated 0.1 M KOH solution.

Table S1. Comparison of ORR catalytic performances in 0.1 M KOH solution between FeNC-ZIF-800 and other non-precious metal-based catalysts reported previously.

| Catalyst                               | Onset potential<br>(V vs. RHE) | Half-wave potential<br>(V vs. RHE ) | Ref.      |
|----------------------------------------|--------------------------------|-------------------------------------|-----------|
| FeNC-ZIF-800                           | 1.0                            | 0.86                                | This work |
| Fe-N/C-800                             | 0.923                          | 0.809                               | 1         |
| Fe <sub>3</sub> C/NG-800               | 1.03                           | 0.86                                | 2         |
| Fe-N/C-800                             | 0.98                           | /                                   | 3         |
| Co <sub>3</sub> O <sub>4</sub> @CMWCNT | 0.89                           | 0.81                                | 4         |
| Co-N-HPC                               | 0.91                           | 0.83                                | 5         |
| GNPCSS-800                             | 0.957                          | 0.82                                | 6         |
| Fe/N/CNT                               | 1.04                           | 0.86                                | 7         |
| Fe-N-GC-900                            | 1.01                           | 0.86                                | 8         |
| Fe <sub>3</sub> C/C-800                | 1.05                           | 0.83                                | 9         |
| GFe-800a                               | -0.087                         | -0.29                               | 10        |
|                                        | (vs. Ag/AgCl)                  | (vs. Ag/AgCl)                       |           |
| Fe-N/G                                 | 0.87                           | 0.78                                | 11        |
| ZIF-67-900                             | 0.95                           | 0.85                                | 12        |
| FePhen@MOF-ArNH <sub>3</sub>           | 1.03                           | 0.86                                | 13        |
| N-Fe-CNT/CNP                           | /                              | 0.87                                | 14        |
| NCNT/CoO-NiO-NiCo                      | 1.0                            | 0.83                                | 15        |
| N-CNT/N-G                              | /                              | 0.85                                | 16        |
| Fe-N <sub>4</sub> /C                   | -                              | 0.87                                | 17        |
| Fe-N-CNS                               | 0.98                           | 0.85                                | 18        |
| Fe <sub>3</sub> C/C-800                | 1.03                           | 0.86                                | 19        |

Table S2. Comparison of ORR catalytic performances in acid solution between FeNC-ZIF-800 and other non-precious metal-based catalysts reported previously.

| Catalyst                              | Onset potential<br>(V vs. RHE) | Half-wave potential<br>(V vs. RHE ) | Electrolyte                    | Ref.      |
|---------------------------------------|--------------------------------|-------------------------------------|--------------------------------|-----------|
| FeNC-ZIF-800                          | 0.85                           | 0.74                                | H <sub>2</sub> SO <sub>4</sub> | This work |
| pPMF-800                              | 0.89                           | 0.71                                | HClO <sub>4</sub>              | 20        |
| CPANiFe-NaCl                          | 0.91                           | 0.74                                | HClO <sub>4</sub>              | 21        |
| PpPD-Fe-C                             | 0.83                           | 0.72                                | H <sub>2</sub> SO <sub>4</sub> | 22        |
| Fe-N-GC-900                           | /                              | 0.74                                | HClO <sub>4</sub>              | 8         |
| Fe-AAPyr                              | 0.9                            | 0.75                                | H <sub>2</sub> SO <sub>4</sub> | 23        |
| H-Fe@N-C/RGO                          | 0.89                           | 0.67                                | HClO <sub>4</sub>              | 24        |
| Fe-N/C-800                            | 0.80                           | 0.68                                | HClO <sub>4</sub>              | 1         |
| Fe-g-C <sub>3</sub> N <sub>4</sub> @C | /                              | 0.75                                | HClO <sub>4</sub>              | 25        |
| Fe-N-HCMS                             | 0.81                           | 0.60                                | H <sub>2</sub> SO <sub>4</sub> | 26        |
| FeNC-70                               | 0.8                            | /                                   | HClO <sub>4</sub>              | 27        |
| PANI-Fe                               | 0.85                           | /                                   | H <sub>2</sub> SO <sub>4</sub> | 28        |
| ZIF-67-900                            | 0.85                           | 0.71                                | H <sub>2</sub> SO <sub>4</sub> | 12        |
| Fe <sub>3</sub> C/NG-800              | 0.92                           | 0.77                                | HClO <sub>4</sub>              | 2         |
| Fe <sub>3</sub> C/C-700               | 0.90                           | 0.73                                | HClO <sub>4</sub>              | 9         |
| Fe-N-CNFs                             | 0.55                           | 0.37                                | H <sub>2</sub> SO <sub>4</sub> | 29        |
|                                       | (vs. Ag/AgCl)                  | (vs. Ag/AgCl)                       |                                |           |

## Reference

- 1 L. Lin, Q. Zhu and A.-W. Xu, *J. Am. Chem. Soc.*, 2014, 136, 11027-11033.
- 2 M. Xiao, J. Zhu, L. Feng, C. Liu and W. Xing, *Adv. Mater.*, 2015, 27, 2521-2527.
- 3 W. Niu, L. Li, X. Liu, N. Wang, J. Liu, W. Zhou, Z. Tang and S. Chen, *J. Am. Chem. Soc.*, 2015, 137, 5555-5562.
- 4 X. Li, Y. Fang, X. Lin, M. Tian, X. An, Y. Fu, R. Li, J. Jin and J. Ma, *J. Mater. Chem. A*, 2015, 3, 17392-17402.
- 5 M. Dou, D. He, W. Shao, H. Liu, F. Wang and L. Dai, *Chem. - Eur. J.*, 2016, 22, 2896-2901.
- 6 H.-x. Zhong, J. Wang, Y.-w. Zhang, W.-l. Xu, W. Xing, D. Xu, Y.-f. Zhang and X.-b. Zhang, *Angew. Chem. Int. Ed.*, 2014, 53, 14235-14239.
- 7 C. Dominguez, F. J. Perez-Alonso, M. A. Salam, S. A. Al-Thabaiti, M. A. Pena, F. J. Garcia-Garcia, L. Barrio and S. Rojas, *Appl. Catal., B*, 2016, 183, 185-196.
- 8 A. Kong, X. Zhu, Z. Han, Y. Yu, Y. Zhang, B. Dong and Y. Shan, *ACS catal.*, 2014, 4, 1793-1800.
- 9 Y. Hu, J. O. Jensen, W. Zhang, L. N. Cleemann, W. Xing, N. J. Bjerrum and Q. Li, *Angew. Chem. Int. Ed.*, 2014, 53, 3675-3679.
- 10 Q. Dong, X. Zhuang, Z. Li, B. Li, B. Fang, C. Yang, H. Xie, F. Zhang and X. Feng, *J. Mater. Chem. A*, 2015, 3, 7767-7772.
- 11 Q. Lai, Q. Su, Q. Gao, Y. Liang, Y. Wang, Z. Yang, X. Zhang, J. He and H. Tong, *ACS Appl. Mater. Interfaces*, 2015, 7, 18170-18178.
- 12 X. Wang, J. Zhou, H. Fu, W. Li, X. Fan, G. Xin, J. Zheng and X. Li, *J. Mater. Chem. A*, 2014, 2, 14064-14070.
- 13 K. Strickland, E. Miner, Q. Jia, U. Tylus, N. Ramaswamy, W. Liang, M. T. Sougrati, F. Jaouen and S. Mukerjee, *Nat Commun*, 2015, 6, 7343.
- 14 H. T. Chung, J. H. Won and P. Zelenay, *Nat. Commun.*, 2013, 4, 1922.
- 15 X. Liu, M. Park, M. G. Kim, S. Gupta, G. Wu and J. Cho, *Angew. Chem. Int. Ed.*, 2015, 54, 9654-9658.
- 16 S. Zhang, H. Zhang, Q. Liu and S. Chen, *J. Mater. Chem. A*, 2013, 1, 3302-3308.
- 17 N. Ramaswamy, U. Tylus, Q. Jia and S. Mukerjee, *J. Am. Chem. Soc.*, 2013, 135, 15443-15449.
- 18 Y. Wang, A. Kong, X. Chen, Q. Lin and P. Feng, *ACS catal.*, 2015, 5, 3887-3893.
- 19 M. Xiao, J. Zhu, L. Feng, C. Liu and W. Xing, *Adv. Mater. (Weinheim, Ger.)*, 2015, 27, 2521-2527.
- 20 W. Yang, X. Yue, X. Liu, L. Chen, J. Jia and S. Guo, *Nanoscale*, 2016, 8, 959-964.
- 21 W. Ding, L. Li, K. Xiong, Y. Wang, W. Li, Y. Nie, S. Chen, X. Qi and Z. Wei, *J. Am. Chem. Soc.*, 2015, 137, 5414-5420.
- 22 Z. Xiang, Y. Xue, D. Cao, L. Huang, J.-F. Chen and L. Dai, *Angew. Chem., Int. Ed.*, 2014, 53, 2433-2437.
- 23 M. H. Robson, A. Serov, K. Artyushkova and P. Atanassov, *Electrochim. Acta*, 2013, 90, 656-665.
- 24 J. Wang, G. Wang, S. Miao, J. Li and X. Bao, *Faraday Discuss.*, 2014, 176, 135-151.
- 25 M.-Q. Wang, W.-H. Yang, H.-H. Wang, C. Chen, Z.-Y. Zhou and S.-G. Sun, *ACS catal.*, 2014, 4, 3928-3936.
- 26 M. Zhou, C. Yang and K.-Y. Chan, *Adv. Energy Mater.*, 2014, 4, 1400840.
- 27 T. Palaniselvam, B. P. Biswal, R. Banerjee and S. Kurungot, *Chem. - Eur. J.*, 2013, 19, 9335-9342.
- 28 H.-W. Liang, W. Wei, Z.-S. Wu, X. Feng and K. Muellen, *J. Am. Chem. Soc.*, 2013, 135, 16002-16005.
- 29 Z. Y. Wu, X. X. Xu, B. C. Hu, H. W. Liang, Y. Lin, L. F. Chen and S. H. Yu, *Angew. Chem. Int. Ed.*, 2015, 54, 8179-8183.
